# Supplementary material for: Neuroprotective and Anti-Amyloid β Effect and Main Chemical Profiles of White Tea: Comparison Against Green, Oolong and Black Tea
Source: PubMed Central journal article supplement (PMC6571989; doi:10.3390/molecules24101926), 2019-05-19
Supplement: molecules-24-01926-s001.pdf [file molecules-24-01926-s001.pdf]

# Neuroprotective and Anti-Amyloid $\beta$ Effect and Main Chemical Profiles of White Tea: Comparison Against Green, Oolong and Black Tea

Xinlei Li<sup>1,2,3</sup>, Scott D. Smid<sup>3</sup>, Jun Lin<sup>2,4</sup>, Zhihong Gong<sup>2</sup>, Chen Si<sup>1,2</sup>, Fangning You<sup>1</sup>, Yan Zhang<sup>1</sup>,

Zhilong Hao<sup>1,2</sup>, Hongzheng Lin<sup>1</sup>, Xiaomin Yu<sup>\*</sup>, and Xinyi Jin<sup>1\*</sup>

<sup>1</sup> College of Horticulture, Fujian Agriculture and Forestry University, Fuzhou 350002, China

<sup>2</sup> FAFU-UCR Joint Center for Horticultural Biology and Metabolomics, Fujian Provincial Key Laboratory of Haixia Applied Plant Systems Biology, Fujian Agriculture and Forestry University, Fuzhou 350002, China

<sup>3</sup> Discipline of Pharmacology, School of Medical Sciences, Faculty of Health Sciences, The University of Adelaide, South Australia 5000, Australia

<sup>4</sup> Fujian Institute of Microbiology, Fuzhou 350007, China

\* Correspondence: (X.Y.): xmyu0616@fafu.edu.cn ; Tel.: +86-591-8639-1591;

(X.J.): jxy427@fafu.edu.cn ; Tel.: +86-136-7501-4927

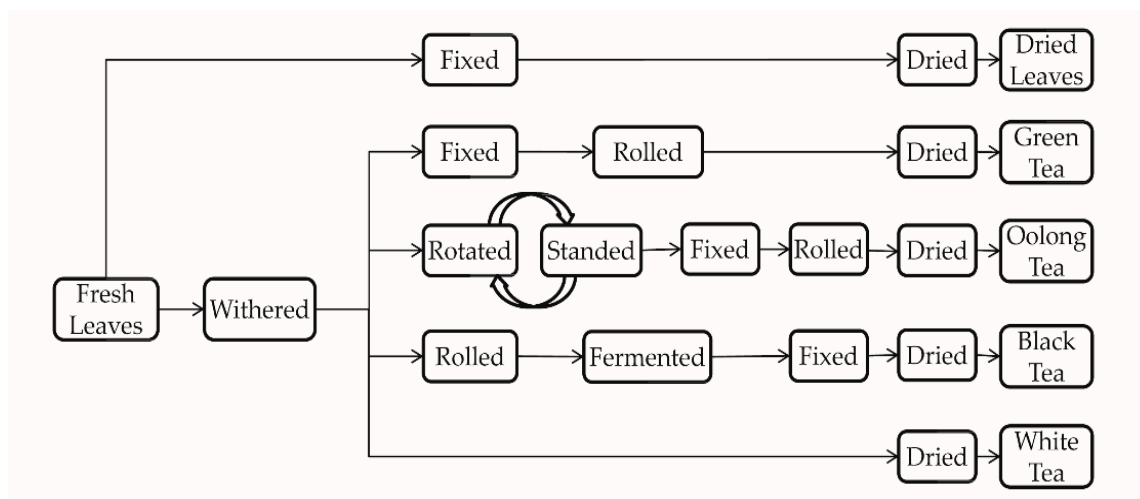

**Figure S1.** The main manufacturing processes of dried leaves, green tea, oolong tea, black tea and white tea.

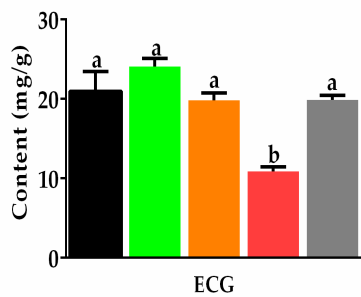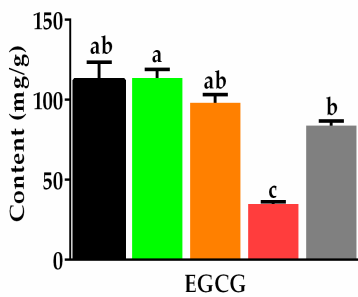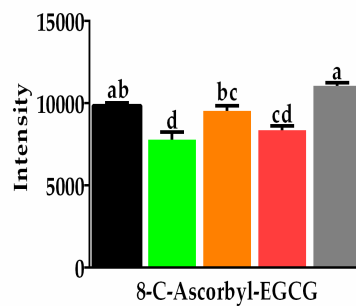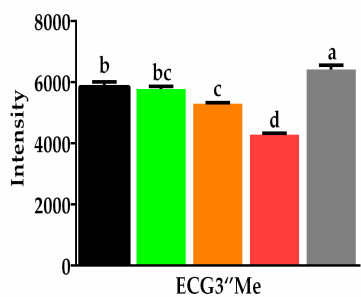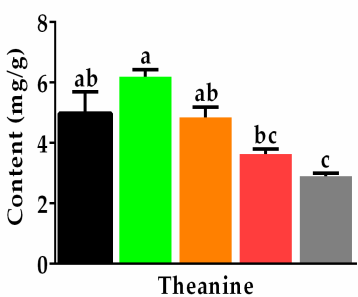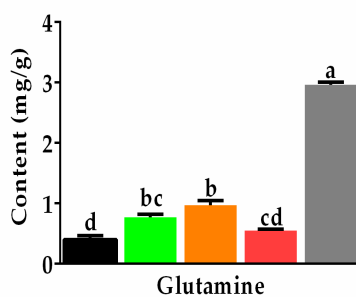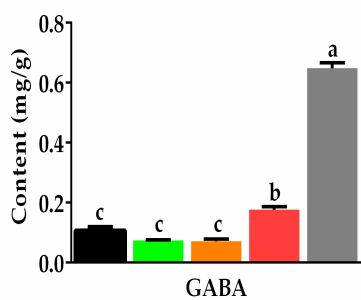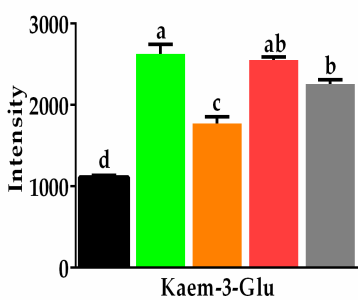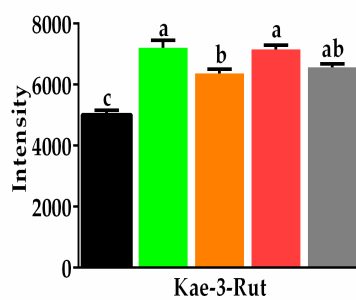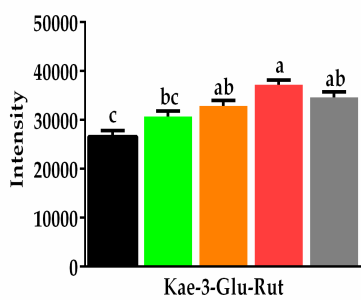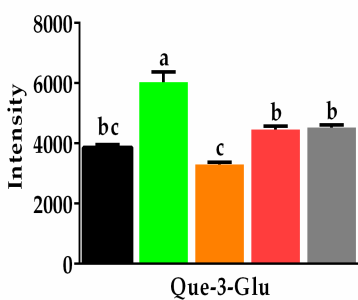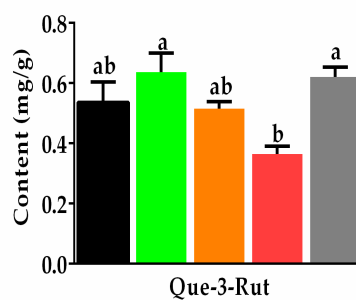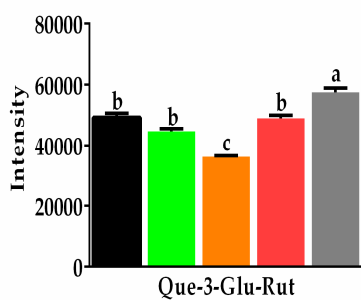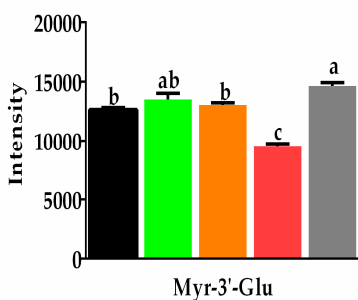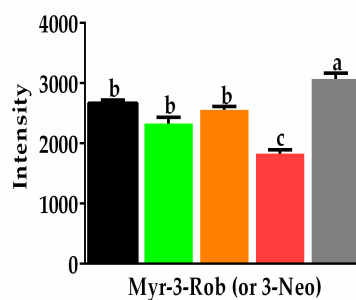

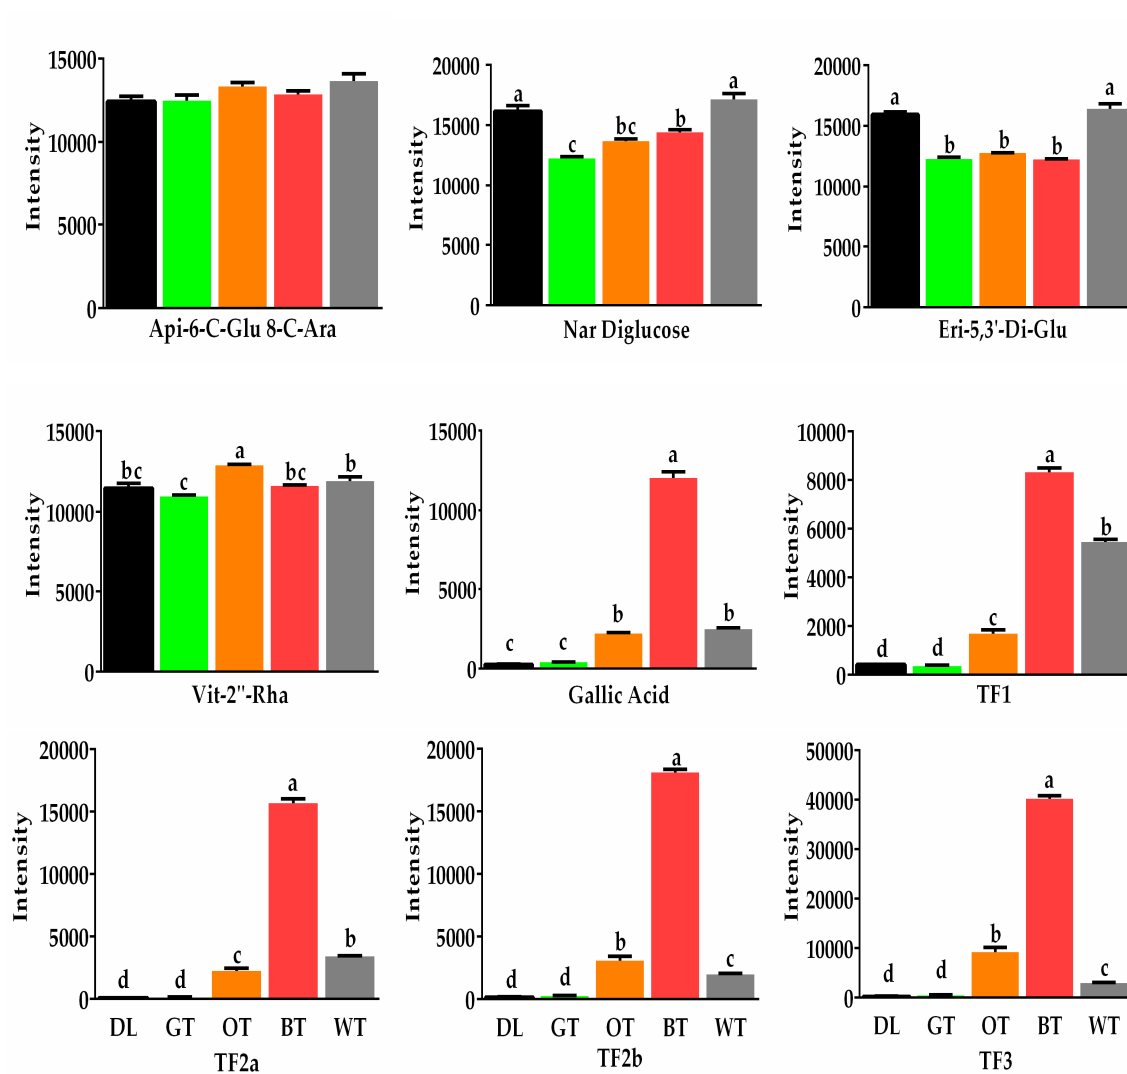

**Figure S2.** Abundance of precedent or potential neuroprotective compounds among different tea types. Lower case letters indicate significant difference ( $p < 0.05$ ) amongst different samples. Results were expressed as mean  $\pm$  standard deviation ( $n = 3$ ).
